# Supplementary material for: Mode of delivery and pregnancy outcomes in preterm birth: a secondary analysis of the WHO Global and Multi-country Surveys
Source: PubMed Central journal article supplement (PMC6820722; doi:10.1038/s41598-019-52015-w), 2019-10-29
Supplement: 41598_2019_52015_MOESM1_ESM.pdf [file 41598_2019_52015_MOESM1_ESM.pdf]

## **Mode of delivery and pregnancy outcomes in preterm birth: a secondary analysis of the WHO Global and Multi-country Surveys**

Bao Yen Luong Thanh<sup>1,2</sup>, Pisake Lumbiganon<sup>3,\*</sup>, Porjai Pattanittum<sup>1</sup>, Malinee Laopaiboon<sup>1</sup>, Joshua P. Vogel<sup>4</sup>, Olufemi T. Oladapo<sup>4</sup>, Cynthia Pileggi-Castro<sup>5</sup>, Rintaro Mori<sup>6</sup>, Kapila Jayaratne<sup>7</sup>, Zahida Qureshi<sup>8</sup>, João Paulo Souza<sup>4,9</sup>, on behalf of the WHO Global and Multi-country Surveys on Maternal and Newborn Health Research Network

| Perinatal outcomes                    | GS (N=14,004)         |                  |               | MCS (N=13,571)        |                  |               |
|---------------------------------------|-----------------------|------------------|---------------|-----------------------|------------------|---------------|
|                                       | n/ N (%)              | Crude OR (95%CI) | aOR (95%CI)   | n/ N (%)              | Crude OR (95%CI) | aOR (95%CI)   |
| <b>APGAR score &lt;7 at 5 minutes</b> | 1,454 / 13,938 (10.4) |                  | *             | 938 / 12,792 (7.3)    |                  | ‡             |
| VB                                    | 1,060 / 10,060 (10.5) | 1                | 1             | 624 / 8,363 (7.5)     | 1                | 1             |
| CS                                    | 394 / 3,878 (10.2)    | 1.0 (0.8-1.1)    | 1.0 (0.8-1.3) | 314 / 4,429 (7.1)     | 1.0 (0.8-1.1)    | 1.2 (0.9-1.6) |
| <b>NICU admission</b>                 | 4,210 / 13,440 (31.3) |                  | *             | 4,448 / 12,831 (34.7) |                  | §             |
| VB                                    | 2,436 / 9,662 (25.2)  | 1                | 1             | 2,463 / 8,393 (29.3)  | 1                | 1             |
| CS                                    | 1,774 / 3,778 (47.0)  | 2.6 (2.4-2.8)    | 2.6 (2.3-3.1) | 1,985 / 4,438 (44.7)  | 1.9 (1.8-2.1)    | 1.7 (1.5-2.0) |
| <b>Fresh stillbirth</b>               | 560 / 14,004 (4.0)    |                  | *             | 757 / 13,571 (5.6)    |                  |               |
| VB                                    | 451 / 10,117 (4.5)    | 1                | 1             | 613 / 8,990 (6.8)     | 1                | 1             |
| CS                                    | 109 / 3,887 (2.8)     | 0.6 (0.5-0.8)    | 0.5 (0.3-0.9) | 144 / 4,581 (3.1)     | 0.4 (0.3-0.5)    | 0.5 (0.3-0.7) |
| <b>Early neonatal death</b>           | 489 / 13,421 (3.6)    |                  | †             | 685 / 12,784 (5.4)    |                  | **            |
| VB                                    | 343 / 9,651 (3.6)     | 1                | 1             | 463 / 8,361 (5.5)     | 1                | 1             |
| CS                                    | 146 / 3,770 (3.9)     | 1.1 (0.9-1.3)    | 1.3 (0.9-1.8) | 222 / 4,423 (5.0)     | 0.9 (0.8-1.1)    | 1.3 (0.9-1.6) |
| <b>Perinatal death</b>                | 1,049 / 13,981 (7.5)  |                  | *             | 1,442 / 13,541 (10.6) |                  | *†            |
| VB                                    | 794 / 10,102 (7.9)    | 1                | 1             | 1,076 / 8,974 (12.0)  | 1                | 1             |
| CS                                    | 255 / 3,879 (6.6)     | 0.8 (0.7-0.9)    | 0.7 (0.6-1.0) | 366 / 4,567 (8.0)     | 0.6 (0.5-0.7)    | 0.9 (0.8-1.1) |

**Table S1. Adverse perinatal outcomes by different modes of delivery in vertex presenting neonates.** \*adjusted for maternal age, maternal education, marital status, parity, underlying disease, preeclampsia, eclampsia, mode of delivery, severity of preterm, birth weight, sex, and FCI; facility was adjusted as a random effect; †adjusted for maternal education, marital status, parity, underlying disease, preeclampsia, eclampsia, mode of delivery, severity of preterm, birth weight, sex, and FCI; facility was adjusted as a random effect; ‡adjusted for maternal age, maternal education, marital status, underlying disease, preeclampsia, eclampsia, mode of delivery, severity of preterm, birth weight, sex, corticosteroids, and FCI; facility was adjusted as a random effect; §adjusted for maternal age, maternal education, marital status, parity, underlying disease, preeclampsia, eclampsia, mode of delivery, severity of preterm, birth weight, sex, corticosteroids, and FCI; facility was adjusted as a random effect; ||adjusted for maternal age, maternal education, marital status, parity, preeclampsia, eclampsia, mode of delivery, severity of preterm, birth weight, corticosteroids and FCI; facility was adjusted as a random effect; \*\*adjusted for maternal age, maternal education, marital status, parity, eclampsia, mode of delivery, severity of preterm, birth weight, sex, corticosteroids, and FCI; facility was adjusted as a random effect; \*†adjusted for maternal age, maternal education, marital status, parity, preeclampsia, eclampsia, mode of delivery, severity of preterm, birth weight, sex, corticosteroids and FCI; facility was adjusted as a random effect.

| Perinatal outcomes                    | GS (N=1,444)       |                  |               | MCS (N=1,452)      |                  |                |
|---------------------------------------|--------------------|------------------|---------------|--------------------|------------------|----------------|
|                                       | n/ N (%)           | Crude OR (95%CI) | aOR (95%CI)   | n/ N (%)           | Crude OR (95%CI) | aOR (95%CI)    |
| <b>APGAR score &lt;7 at 5 minutes</b> | 373/ 1,440 (25.9)  |                  | *             | 226 / 1,261 (17.9) |                  |                |
| VB                                    | 237/ 545 (43.5)    | 1                | 1             | 117 / 373 (31.4)   | 1                | 1              |
| CS                                    | 136/ 895 (15.2)    | 0.2 (0.1-0.3)    | 0.2 (0.1-0.4) | 109 / 888 (12.3)   | 0.3 (0.2-0.4)    | 0.5 (0.3-0.8)  |
| <b>NICU admission</b>                 | 667 / 1,285 (51.9) |                  | †             | 669 / 1,263 (53.0) |                  | **             |
| VB                                    | 203 / 423 (48.0)   | 1                | 1             | 219 / 376 (58.2)   | 1                | 1              |
| CS                                    | 464 / 862 (53.8)   | 1.3 (1.0-1.6)    | 1.6 (1.1-2.3) | 450 / 887 (50.7)   | 0.7 (0.6-0.9)    | 0.8 (0.6-1.2)  |
| <b>Fresh stillbirth</b>               | 157 / 1,444 (10.9) |                  | ‡             | 190 / 1,452 (13.1) |                  | *†             |
| VB                                    | 124 / 547 (22.7)   | 1                | 1             | 147 / 523 (28.1)   | 1                | 1              |
| CS                                    | 33 / 897 (3.7)     | 0.1 (0.09-0.2)   | 0.2 (0.1-0.3) | 43 / 929 (13.1)    | 0.1 (0.09-0.2)   | 0.1 (0.03-0.3) |
| <b>Early neonatal death</b>           | 124 / 1,284 (9.7)  |                  | §             | 148 / 1,255 (11.8) |                  | *§             |
| VB                                    | 62 / 422 (14.7)    | 1                | 1             | 84 / 374 (22.5)    | 1                | 1              |
| CS                                    | 62 / 862 (7.2)     | 0.5 (0.3-0.7)    | 0.9 (0.5-1.5) | 64 / 881 (7.3)     | 0.3 (0.2-0.4)    | 0.6 (0.4-0.9)  |
| <b>Perinatal death</b>                | 281 / 1,441 (19.5) |                  | *             | 338 / 1,445 (23.4) |                  | *              |
| VB                                    | 186 / 546 (34.1)   | 1                | 1             | 231 / 521 (44.3)   | 1                | 1              |
| CS                                    | 95 / 895 (10.6)    | 0.2 (0.1-0.3)    | 0.4 (0.2-0.6) | 107 / 924 (11.6)   | 0.16 (0.1-0.21)  | 0.3 (0.2-0.4)  |

**Table S2. Adverse perinatal outcomes by modes of delivery in non-vertex presenting neonates.** \*adjusted for maternal age, maternal education, parity, underlying disease, eclampsia, mode of delivery, severity of preterm, birth weight, and FCI; facility was adjusted as a random effect; †adjusted for maternal education, marital status, parity, underlying disease, preeclampsia, mode of delivery, severity of preterm, birth weight, and FCI; facility was adjusted as a random effect; ‡adjusted for maternal age, maternal education, marital status, underlying disease, eclampsia, mode of delivery, severity of preterm, birth weight, sex, and FCI; facility was adjusted as a random effect; §adjusted for maternal education, parity, underlying disease, preeclampsia, mode of delivery, severity of preterm, birth weight, and FCI; facility was adjusted as a random effect; ||adjusted for maternal education, marital status, underlying disease, mode of delivery, severity of preterm, birth weight, corticosteroids, and FCI; facility was adjusted as a random effect; \*\*adjusted for maternal age, maternal education, marital status, preeclampsia, mode of delivery, severity of preterm, birth weight, corticosteroids, and FCI; facility was adjusted as a random effect; \*†adjusted for maternal education, marital status, underlying disease, mode of delivery, severity of preterm, birth weight, sex, corticosteroids and FCI; facility was adjusted as a random effect; \*‡adjusted for maternal education, marital status, underlying disease, preeclampsia, mode of delivery, severity of preterm, birth weight, sex, corticosteroids and FCI; facility was adjusted as a random effect; \*§adjusted for maternal education, mode of delivery, severity of preterm, birth weight, corticosteroids and FCI; facility was adjusted as a random effect; \*||adjusted for maternal education, marital status, underlying disease, preeclampsia, mode of delivery, severity of preterm, birth weight, sex, corticosteroids and FCI; facility was adjusted as a random effect.

| Perinatal outcomes                    | GS (N=532)       |                  |               | MCS (N=615)      |                  |                |
|---------------------------------------|------------------|------------------|---------------|------------------|------------------|----------------|
|                                       | n/ N (%)         | Crude OR (95%CI) | aOR (95%CI)   | n/ N (%)         | Crude OR (95%CI) | aOR (95%CI)    |
| <b>APGAR score &lt;7 at 5 minutes</b> | 341 / 530 (64.3) |                  | *             | 183 / 389 (47.0) |                  | **             |
| VB                                    | 289 / 417 (69.3) | 1                | 1             | 136 / 276 (49.3) | 1                | 1              |
| CS                                    | 52 / 113 (46.0)  | 0.4 (0.3-0.6)    | 0.4 (0.2-0.8) | 47 / 113 (41.6)  | 0.7 (0.5-1.1)    | 0.8 (0.4-1.7)  |
| <b>NICU admission</b>                 | 276 / 370 (74.6) |                  | †             | 301 / 392 (76.8) |                  | *†             |
| VB                                    | 195 / 273 (71.4) | 1                | 1             | 200 / 282 (70.9) | 1                | 1              |
| CS                                    | 81 / 97 (83.5)   | 2.0 (1.1-3.7)    | 2.0 (0.8-5.5) | 101 / 110 (91.8) | 4.6 (2.2-9.5)    | 7.1 (1.8-28.9) |
| <b>Fresh stillbirth</b>               | 160 / 532 (30.1) |                  | ‡             | 230 / 615 (37.4) |                  | *‡             |
| VB                                    | 144 / 419 (34.4) | 1                | 1             | 207 / 480 (43.1) | 1                | 1              |
| CS                                    | 16 / 113 (14.2)  | 0.3 (0.2-0.6)    | 0.3 (0.2-0.7) | 23 / 135 (17.0)  | 0.3 (0.2-0.4)    | 0.3 (0.2-0.6)  |
| <b>Early neonatal death</b>           | 169 / 368 (45.9) |                  | §             | 195 / 381 (51.2) |                  | *§             |
| VB                                    | 129 / 271 (47.6) | 1                | 1             | 137 / 271 (50.6) | 1                | 1              |
| CS                                    | 40 / 97 (41.2)   | 0.8 (0.5-1.2)    | 0.9 (0.4-1.8) | 58 / 110 (52.7)  | 1.1 (0.7-1.7)    | 2.0 (0.9-4.1)  |
| <b>Perinatal death</b>                | 329 / 528 (62.3) |                  |               | 425 / 611 (69.6) |                  | *              |
| VB                                    | 273 / 415 (65.8) | 1                | 1             | 344 / 478 (72.0) | 1                | 1              |
| CS                                    | 56 / 113 (49.6)  | 0.5 (0.3-0.8)    | 0.5 (0.3-1.0) | 81 / 133 (60.9)  | 0.6 (0.4-0.9)    | 1.2 (0.6-2.4)  |

**Table S3. Adverse perinatal outcomes by modes of delivery in extremely preterm birth (22-<28 weeks).** \*adjusted for maternal education, marital status, parity, underlying disease, mode of delivery, gestational age, fetal presentation, birth weight, and FCI; facility was adjusted as a random effect; †adjusted for maternal education, marital status, parity, underlying disease, mode of delivery, gestational age, fetal presentation, birth weight, and FCI; facility was adjusted as a random effect; ‡adjusted for maternal education, parity, underlying disease, eclampsia, mode of delivery, gestational age, fetal presentation, birth weight and FCI; facility was adjusted as a random effect; §adjusted for maternal education, marital status, underlying disease, preeclampsia, mode of delivery, gestational age, fetal presentation, birth weight, and FCI; facility was adjusted as a random effect; ||adjusted for maternal education, parity, underlying disease, preeclampsia, eclampsia, mode of delivery, gestational age, fetal presentation, birth weight and FCI; facility was adjusted as a random effect; \*\*adjusted for maternal education, marital status, mode of delivery, gestational age, fetal presentation, birth weight, corticosteroids and FCI; facility was adjusted as a random effect; \*†adjusted for maternal age, maternal education, marital status, mode of delivery, gestational age, birth weight, corticosteroids and FCI; facility was adjusted as a random effect; \*‡adjusted for maternal education, marital status, mode of delivery, gestational age, fetal presentation, corticosteroids and FCI; facility was adjusted as a random effect; \*§adjusted for maternal education, marital status, eclampsia, mode of delivery, gestational age, birth weight, corticosteroids and FCI; facility was adjusted as a random effect; \*||adjusted for maternal age, maternal education, marital status, eclampsia, mode of delivery, gestational age, fetal presentation, birth weight, sex, corticosteroids and FCI; facility was adjusted as a random effect.

| Perinatal outcomes                    | GS (N=1,584)       |                  |               | MCS (N=1,844)        |                  |               |
|---------------------------------------|--------------------|------------------|---------------|----------------------|------------------|---------------|
|                                       | n/ N (%)           | Crude OR (95%CI) | aOR (95%CI)   | n/ N (%)             | Crude OR (95%CI) | aOR (95%CI)   |
| <b>APGAR score &lt;7 at 5 minutes</b> | 506 / 1,580 (32.0) |                  | *             | 391 / 1,541 (25.4)   |                  |               |
| VB                                    | 360 / 1,049 (34.3) | 1                | 1             | 244 / 946 (25.8)     | 1                | 1             |
| CS                                    | 146 / 531 (27.5)   | 0.7 (0.5-0.9)    | 0.7 (0.5-0.9) | 147 / 595 (24.7)     | 0.9 (0.8-1.2)    | 1.1 (0.7-1.8) |
| <b>NICU admission</b>                 | 904 / 1,387 (65.2) |                  | †             | 1,148 / 1,543 (74.4) |                  | **            |
| VB                                    | 528 / 903 (58.5)   | 1                | 1             | 666 / 946 (70.4)     | 1                | 1             |
| CS                                    | 376 / 484 (77.7)   | 2.5 (1.9-3.2)    | 2.1 (1.4-3.1) | 482 / 597 (80.7)     | 1.8 (1.4-2.3)    | 1.2 (0.8-1.8) |
| <b>Fresh stillbirth</b>               | 196 / 1,584 (12.4) |                  | ‡             | 309 / 1,844 (16.8)   |                  | *†            |
| VB                                    | 149 / 1,052 (14.2) | 1                | 1             | 250 / 1,191 (21.0)   | 1                | 1             |
| CS                                    | 47 / 532 (8.8)     | 0.6 (0.4-0.8)    | 0.6 (0.4-0.9) | 59 / 653 (9.0)       | 0.4 (0.3-0.5)    | 0.4 (0.2-0.6) |
| <b>Early neonatal death</b>           | 237 / 1,383 (17.1) |                  | §             | 321 / 1,527 (21.0)   |                  | *‡            |
| VB                                    | 144 / 902 (16.0)   | 1                | 1             | 222 / 936 (23.7)     | 1                | 1             |
| CS                                    | 93 / 481 (19.3)    | 1.3 (0.9-1.7)    | 1.3 (0.8-2.0) | 99 / 591 (16.8)      | 0.7 (0.5-0.8)    | 0.7 (0.5-1.1) |
| <b>Perinatal death</b>                | 433 / 1,579 (27.4) |                  | ‡             | 630 / 1,836 (34.3)   |                  | *§            |
| VB                                    | 293 / 1,051 (27.9) | 1                | 1             | 472 / 1,186 (39.8)   | 1                | 1             |
| CS                                    | 140 / 528 (26.5)   | 0.9 (0.7-1.2)    | 0.8 (0.5-1.2) | 158 / 650 (24.3)     | 0.5 (0.4-0.6)    | 0.6 (0.4-0.9) |

**Table S4. Adverse perinatal outcomes by modes of delivery in very preterm birth (28-<32 weeks).** \*adjusted for maternal age, maternal education, marital status, underlying disease, eclampsia, mode of delivery, gestational age, fetal presentation, birth weight, and FCI; facility was adjusted as a random effect; †adjusted for maternal education, marital status, underlying disease, preeclampsia, mode of delivery, birth weight and FCI; facility was adjusted as a random effect; ‡adjusted for maternal education, marital status, parity, underlying disease, eclampsia, mode of delivery, gestational age, fetal presentation, birth weight, sex and FCI; facility was adjusted as a random effect; §adjusted for maternal education, parity, underlying disease, mode of delivery, gestational age, fetal presentation, birth weight, sex and FCI; facility was adjusted as a random effect; ||adjusted for maternal age, maternal education, marital status, mode of delivery, gestational age, fetal presentation, birth weight, sex, corticosteroids and FCI; facility was adjusted as a random effect; \*\*adjusted for maternal age, maternal education, marital status, mode of delivery, gestational age, fetal presentation, birth weight, corticosteroids and FCI; facility was adjusted as a random effect; \*†adjusted for maternal age, maternal education, marital status, mode of delivery, preeclampsia, eclampsia, gestational age, fetal presentation, birth weight, sex, corticosteroids and FCI; facility was adjusted as a random effect; \*‡adjusted for maternal age, maternal education, marital status, parity, eclampsia, mode of delivery, gestational age, fetal presentation, birth weight, sex, corticosteroids and FCI; facility was adjusted as a random effect; \*§adjusted for maternal age, maternal education, marital status, eclampsia, mode of delivery, gestational age, fetal presentation, birth weight, sex, corticosteroids and FCI; facility was adjusted as a random effect.

| Perinatal outcomes                    | GS (N=13,355)        |                  |               | MCS (N=12,594)       |                  |               |
|---------------------------------------|----------------------|------------------|---------------|----------------------|------------------|---------------|
|                                       | n/ N (%)             | Crude OR (95%CI) | aOR (95%CI)   | n/ N (%)             | Crude OR (95%CI) | aOR (95%CI)   |
| <b>APGAR score &lt;7 at 5 minutes</b> | 986/ 13,291 (7.4)    |                  | *             | 591/ 12,142 (4.9)    |                  | ‡             |
| VB                                    | 650/ 9,144 (7.1)     | 1                | 1             | 362/ 7,516 (4.8)     | 1                | 1             |
| CS                                    | 336/ 4,147 (8.1)     | 1.15 (1.0-1.3)   | 0.9 (0.6-1.2) | 229/ 4,626 (5.0)     | 1.0 (0.9-1.2)    | 1.2 (0.9-1.5) |
| <b>NICU admission</b>                 | 3,708/ 12,989 (28.5) |                  | *             | 3,683/ 12,182 (30.2) |                  | §             |
| VB                                    | 1,917/ 8,913 (21.5)  | 1                | 1             | 1,819/ 7,546 (24.1)  | 1                | 1             |
| CS                                    | 1,791/ 4,076 (43.9)  | 2.9 (2.6-3.1)    | 2.7 (2.3-3.2) | 1,864/ 4,636 (40.2)  | 2.1 (2.0-2.3)    | 1.8 (1.6-2.1) |
| <b>Fresh stillbirth</b>               | 363/ 13,355 (2.7)    |                  | *             | 415/ 12,594 (3.3)    |                  | §             |
| VB                                    | 283/ 9,198 (3.1)     | 1                | 1             | 309/ 7,853 (3.9)     | 1                | 1             |
| CS                                    | 80/ 4,157 (1.9)      | 0.6 (0.5-0.8)    | 0.4 (0.2-0.7) | 106/ 4,741 (2.2)     | 0.6 (0.5-0.7)    | 0.4 (0.3-0.7) |
| <b>Early neonatal death</b>           | 210/ 12,974 (1.6)    |                  | †             | 320/ 12,153 (2.6)    |                  |               |
| VB                                    | 133/ 8,904 (1.5)     | 1                | 1             | 190/ 7,532 (2.5)     | 1                | 1             |
| CS                                    | 77/ 4,070 (1.9)      | 1.3 (0.9-1.7)    | 1.2 (0.8-1.7) | 130/ 4,621 (2.8)     | 1.1 (0.9-1.4)    | 0.8 (0.4-1.3) |
| <b>Perinatal death</b>                | 573/ 13,337 (4.3)    |                  | *             | 735/ 12,568 (5.8)    |                  | §             |
| VB                                    | 416/ 9,187 (4.5)     | 1                | 1             | 499 / 7,841 (6.4)    | 1                | 1             |
| CS                                    | 157/ 4,150 (3.8)     | 0.8 (0.7-1.0)    | 0.5 (0.4-0.8) | 236 / 4,727 (5.0)    | 0.8 (0.7-0.9)    | 0.6 (0.5-0.9) |

**Table S5. Adverse perinatal outcomes by different modes of delivery in moderate preterm birth (32-<37 weeks).** \*adjusted for maternal age, maternal education, marital status, parity, underlying disease, eclampsia, preeclampsia, mode of delivery, gestational age, fetal presentation, birth weight, sex and FCI; facility was adjusted as a random effect; †adjusted for maternal education, marital status, parity, underlying disease, preeclampsia, eclampsia, mode of delivery, gestational age, fetal presentation, birth weight and FCI; facility was adjusted as a random effect; ‡adjusted for maternal education, marital status, underlying disease, preeclampsia, eclampsia, mode of delivery, gestational age, fetal presentation, birth weight, sex, corticosteroids and FCI; facility was adjusted as a random effect; §adjusted for maternal age, maternal education, marital status, parity, underlying disease, preeclampsia, eclampsia, mode of delivery, gestational age, fetal presentation, birth weight, sex, corticosteroids and FCI; facility was adjusted as a random effect; ||adjusted for maternal education, marital status, preeclampsia, eclampsia, mode of delivery, gestational age, fetal presentation, birth weight, sex, corticosteroids and FCI; facility was adjusted as a random effect.

| Region                     | Mode of delivery | MICU admission  |                   | Maternal near miss |                   | Maternal death |                   |
|----------------------------|------------------|-----------------|-------------------|--------------------|-------------------|----------------|-------------------|
|                            |                  | n/N (%)         | Crude OR (95% CI) | n/N (%)            | Crude OR (95% CI) | n/N (%)        | Crude OR (95% CI) |
| <b>Africa</b>              |                  |                 |                   |                    |                   |                |                   |
| GS                         | VB               | 11/ 2516 (0.4)  | 1                 | NA                 | NA                | 7/ 2515 (0.3)  | 1                 |
|                            | CS               | 113/ 473 (23.9) | 71.5 (38.1-134.1) | NA                 | NA                | 7/ 471 (1.5)   | 5.4 (1.9-15.5)    |
| MCS                        | VB               | 4/ 1860 (0.2)   | 1                 | 18/ 1860 (1.0)     | 1                 | 10/ 1860 (0.5) | 1                 |
|                            | CS               | 11/ 700 (1.6)   | 7.4 (2.4-23.3)    | 41/ 700 (5.9)      | 6.4 (3.6-11.2)    | 8/ 700 (1.1)   | 2.1 (0.8-5.4)     |
| <b>The Americas</b>        |                  |                 |                   |                    |                   |                |                   |
| GS                         | VB               | 31/ 2709 (1.1)  | 1                 | NA                 | NA                | 1/ 2711 (0.04) | 1                 |
|                            | CS               | 173/ 2453 (7.1) | 6.6 (4.5-9.7)     | NA                 | NA                | 3/ 2455 (0.1)  | 3.3 (0.3-31.9)    |
| MCS                        | VB               | 14/ 1888 (0.7)  | 1                 | 7/ 1894 (0.4)      | 1                 | 1/ 1894 (0.1)  | 1                 |
|                            | CS               | 151/ 2370 (6.4) | 9.1 (5.3-15.8)    | 83/ 2382 (3.5)     | 9.7 (4.5-21.1)    | 9/ 2382 (0.4)  | 7.2 (0.9-56.7)    |
| <b>South East Asia</b>     |                  |                 |                   |                    |                   |                |                   |
| GS                         | VB               | 52/ 3687 (1.4)  | 1                 | NA                 | NA                | 9/ 3687 (0.2)  | 1                 |
|                            | CS               | 72/ 1211 (5.9)  | 4.4 (3.1-6.4)     | NA                 | NA                | 2/ 1211 (0.2)  | 0.7 (0.2-3.1)     |
| MCS                        | VB               | 10/ 4197 (0.2)  | 1                 | 30/ 4197 (0.7)     | 1                 | 10/ 4197 (0.2) | 1                 |
|                            | CS               | 48/ 1657 (2.9)  | 12.5 (6.3-24.8)   | 41/ 1657 (2.5)     | 3.5 (2.2-5.7)     | 3/ 1657 (0.2)  | 0.8 (0.2-2.8)     |
| <b>The Western Pacific</b> |                  |                 |                   |                    |                   |                |                   |
| GS                         | VB               | 34/ 1753 (1.9)  | 1                 | NA                 | NA                | 3/ 1753 (0.2)  | 1                 |
|                            | CS               | 92/ 662 (13.9)  | 8.2 (5.4-12.2)    | NA                 | NA                | 2/ 662 (0.3)   | 1.8 (0.3-10.6)    |
| MCS                        | VB               | 14/ 1573 (0.9)  | 1                 | 6/ 1573 (0.4)      | 1                 | 2/ 1573 (0.1)  | 1                 |
|                            | CS               | 35/ 790 (4.4)   | 5.2 (2.8-9.7)     | 31/ 790 (3.9)      | 10.7 (4.4-25.7)   | 1/ 790 (0.1)   | 1.0 (0.1-11.0)    |

**Table S6. Adverse maternal outcomes by different modes of delivery by regions.** NA: Data was not available.

| Region                     | Mode of delivery | APGAR score <7   |                   |               | NICU admission    |                   |               |
|----------------------------|------------------|------------------|-------------------|---------------|-------------------|-------------------|---------------|
|                            |                  | n/N (%)          | Crude OR (95% CI) | aOR (95% CI)  | n/N (%)           | Crude OR (95% CI) | aOR (95% CI)  |
| <b>Africa</b>              |                  |                  |                   |               |                   |                   |               |
| GS                         | VB               | 292/ 2473 (11.8) | 1                 | 1 *           | 301/ 2382 (12.6)  | 1                 | 1 †           |
|                            | CS               | 112/ 465 (24.1)  | 2.4 (1.9-3.0)     | 1.6 (1.1-2.2) | 198/ 437 (45.3)   | 5.7 (4.6-7.2)     | 4.8 (2.5-9.0) |
| MCS                        | VB               | 168/ 1671 (10.1) | 1                 | 1 ‡           | 459/ 1684 (27.3)  | 1                 | 1 §           |
|                            | CS               | 111/ 640 (17.3)  | 1.9 (1.5-2.4)     | 1.8 (1.3-2.6) | 295/ 642 (46.0)   | 2.3 (1.9-2.7)     | 2.3 (1.7-3.1) |
| <b>The Americas</b>        |                  |                  |                   |               |                   |                   |               |
| GS                         | VB               | 323/ 2703 (11.9) | 1                 | 1             | 905/ 2567 (35.3)  | 1                 | 1 **          |
|                            | CS               | 220/ 2453 (9.0)  | 0.7 (0.6-0.9)     | 0.6 (0.5-0.8) | 1279/ 2398 (53.3) | 2.1 (1.9-2.4)     | 2.4 (2.0-2.8) |
| MCS                        | VB               | 133/ 1778 (7.5)  | 1                 | 1 *†          | 577/ 1773 (32.5)  | 1                 | 1 *‡          |
|                            | CS               | 146/ 2327 (6.3)  | 0.8 (0.7-1.0)     | 0.8 (0.5-1.1) | 1177/ 2325 (50.6) | 2.1 (1.9-2.4)     | 2.1 (1.7-2.6) |
| <b>South East Asia</b>     |                  |                  |                   |               |                   |                   |               |
| GS                         | VB               | 485/ 3682 (13.2) | 1                 | 1 *§          | 792/ 3448 (23.0)  | 1                 | 1 *           |
|                            | CS               | 118/ 1211 (9.7)  | 0.7 (0.6-0.9)     | 0.9 (0.7-1.3) | 415/ 1178 (35.2)  | 1.8 (1.6-2.1)     | 2.0 (1.6-2.4) |
| MCS                        | VB               | 324/ 3800 (8.5)  | 1                 | 1 ††          | 1062/ 3821 (27.8) | 1                 | 1 †‡          |
|                            | CS               | 115/ 1599 (7.2)  | 0.8 (0.7-1.0)     | 1.3 (0.9-1.7) | 629/ 1608 (39.1)  | 1.7 (1.5-1.9)     | 1.6 (1.2-2.1) |
| <b>The Western Pacific</b> |                  |                  |                   |               |                   |                   |               |
| GS                         | VB               | 199/ 1752 (11.4) | 1                 | 1 †‡          | 642/ 1692 (37.9)  | 1                 | 1 †§          |
|                            | CS               | 84/ 662 (12.7)   | 1.1 (0.9-1.5)     | 1.1 (0.6-2.0) | 356/ 644 (55.3)   | 2.0 (1.7-2.4)     | 2.2 (1.4-3.5) |
| MCS                        | VB               | 117/ 1489 (7.9)  | 1                 | 1 †           | 587/ 1496 (39.2)  | 1                 | 1 †           |
|                            | CS               | 51/ 768 (6.6)    | 0.8 (0.6-1.2)     | 0.9 (0.6-1.7) | 347/ 768 (45.2)   | 1.3 (1.1-1.5)     | 1.1 (0.7-1.6) |

**Table S7. Adverse perinatal outcomes by different modes of delivery by regions.** \*adjusted for maternal age, maternal education, marital status, parity, underlying disease, eclampsia, mode of delivery, gestational age, fetal presentation, birth weight, and FCI; facility was adjusted as a random effect; †adjusted for maternal age, maternal education, marital status, parity, underlying disease, mode of delivery, gestational age, fetal presentation, birth weight and FCI; facility was adjusted as a random effect; ‡adjusted for maternal age, maternal education, marital status, mode of delivery, gestational age, fetal presentation, birth weight, sex and FCI; facility was adjusted as a random effect; §adjusted for maternal age, maternal education, marital status, eclampsia, preeclampsia, mode of delivery, gestational age, fetal presentation, birth weight, sex and FCI; facility was adjusted as a random effect; ||adjusted for maternal age, maternal education, marital status, eclampsia, underlying disease, mode of delivery, gestational age, fetal presentation, birth weight, and FCI; facility was adjusted as a random effect; \*\*adjusted for maternal education, eclampsia, preeclampsia, underlying disease, mode of delivery, gestational age, fetal presentation, birth weight, sex, and FCI; facility was adjusted as a random effect; \*†adjusted for maternal age, maternal education, marital status, underlying disease, mode of delivery, gestational age, fetal presentation, birth weight, and FCI; facility was adjusted as a random effect; \*‡adjusted for maternal age, maternal education, marital status, parity, eclampsia, preeclampsia, underlying disease, mode of delivery, gestational age, fetal presentation, birth weight, sex, and FCI; facility was adjusted as a random effect; \*§adjusted for maternal education, eclampsia,



preeclampsia, mode of delivery, gestational age, fetal presentation, birth weight, sex; facility was adjusted as a random effect; \*|| adjusted for maternal age, maternal education, parity, eclampsia, preeclampsia, underlying disease, mode of delivery, gestational age, fetal presentation, birth weight, and sex; facility was adjusted as a random effect; †† adjusted for maternal education, eclampsia, preeclampsia, mode of delivery, gestational age, fetal presentation, birth weight, and sex; facility was adjusted as a random effect; †‡ adjusted for maternal education, parity, eclampsia, preeclampsia, underlying disease, mode of delivery, gestational age, fetal presentation, birth weight, sex, and FCI; facility was adjusted as a random effect; †§ adjusted for maternal education, preeclampsia, mode of delivery, gestational age, birth weight, and FCI; facility was adjusted as a random effect; †|| adjusted for maternal education, mode of delivery, gestational age, fetal presentation, birth weight, and FCI; facility was adjusted as a random effect.

| Region                     | Mode of delivery | Stillbirth      |                  |               | Early neonatal death |                  |               | Perinatal death  |                  |               |  |
|----------------------------|------------------|-----------------|------------------|---------------|----------------------|------------------|---------------|------------------|------------------|---------------|--|
|                            |                  | n/N (%)         | Crude OR (95%CI) | aOR (95%CI)   | n/N (%)              | Crude OR (95%CI) | aOR (95%CI)   | n/N (%)          | Crude OR (95%CI) | aOR (95%CI)   |  |
| <b>Africa</b>              |                  |                 |                  |               |                      |                  |               |                  |                  |               |  |
| GS                         | VB               | 133/ 2516 (5.3) | 1                | 1 *           | 82/ 2378 (3.4)       | 1                | 1 †           | 215/2511 (8.6)   | 1                | 1 ‡           |  |
|                            | CS               | 36/ 473 (7.6)   | 1.5 (1.0-2.2)    | 1.0 (0.6-1.6) | 20/ 436 (4.6)        | 1.4 (0.8-2.2)    | 0.9 (0.4-2.0) | 56/ 472 (11.9)   | 1.4 (1.1-2.0)    | 0.9 (0.6-1.5) |  |
| MCS                        | VB               | 175/ 1860 (9.4) | 1                | 1 §           | 155/ 1683 (9.2)      | 1                | 1             | 330/ 1858 (17.8) | 1                | 1 **          |  |
|                            | CS               | 57/ 700 (8.1)   | 0.9 (0.6-1.2)    | 0.6 (0.4-0.8) | 76/ 643 (11.8)       | 1.3 (1.0-1.8)    | 1.8 (1.1-2.8) | 133/ 700 (19.0)  | 1.1 (0.9-1.4)    | 0.7 (0.4-1.1) |  |
| <b>The Americas</b>        |                  |                 |                  |               |                      |                  |               |                  |                  |               |  |
| GS                         | VB               | 143/ 2713 (5.3) | 1                | 1 *†          | 129/ 2561 (5.0)      | 1                | 1 *‡          | 272/ 2704 (10.1) | 1                | 1 *§          |  |
|                            | CS               | 56/ 2456 (2.3)  | 0.4 (0.3-0.6)    | 0.5 (0.4-0.8) | 108/ 2390 (4.5)      | 0.9 (0.7-1.2)    | 1.2 (0.8-1.8) | 164/ 2446 (6.7)  | 0.6 (0.5-0.8)    | 0.8 (0.6-1.1) |  |
| MCS                        | VB               | 142/ 1894 (7.5) | 1                | 1 *           | 86/ 1751 (4.9)       | 1                | 1 ††          | 228/ 1893 (12.0) | 1                | 1 †‡          |  |
|                            | CS               | 63/ 2382 (2.6)  | 0.3 (0.2-0.5)    | 0.4 (0.2-0.6) | 96/ 2309 (4.2)       | 0.8 (0.6-1.1)    | 0.6 (0.4-0.9) | 159/ 2372 (6.7)  | 0.5 (0.4-0.7)    | 0.9 (0.6-1.5) |  |
| <b>South East Asia</b>     |                  |                 |                  |               |                      |                  |               |                  |                  |               |  |
| GS                         | VB               | 239/ 3687 (6.5) | 1                | 1 †§          | 95/ 3448 (2.8)       | 1                | 1 †           | 334/ 3687 (9.1)  | 1                | 1 †‡          |  |
|                            | CS               | 33/ 1211 (2.7)  | 0.4 (0.3-0.6)    | 0.5 (0.3-0.7) | 39/ 1178 (3.3)       | 1.2 (0.8-1.8)    | 1.8 (1.1-2.9) | 72/ 1211 (5.9)   | 0.6 (0.5-0.8)    | 0.7 (0.5-1.0) |  |
| MCS                        | VB               | 374/ 4197 (8.9) | 1                | 1 ‡§          | 215/ 3817 (5.6)      | 1                | 1 ‡           | 589/ 4191 (14.1) | 1                | 1 §§          |  |
|                            | CS               | 48/ 1657 (2.9)  | 0.3 (0.2-0.4)    | 0.3 (0.2-0.5) | 78/ 1606 (4.9)       | 0.9 (0.7-1.1)    | 1.1 (0.8-1.6) | 126/ 1654 (7.6)  | 0.5 (0.4-0.6)    | 0.6 (0.5-0.8) |  |
| <b>The Western Pacific</b> |                  |                 |                  |               |                      |                  |               |                  |                  |               |  |
| GS                         | VB               | 61/ 1753 (3.5)  | 1                | 1 §           | 100/ 1690 (5.9)      | 1                | 1             | 161/ 1751 (9.2)  | 1                | 1 ***         |  |
|                            | CS               | 18/ 662 (2.7)   | 0.8 (0.5-1.3)    | 1.1 (0.6-2.1) | 43/ 644 (6.7)        | 1.1 (0.8-1.7)    | 1.4 (0.8-2.5) | 61/ 662 (9.2)    | 1.0 (0.7-1.4)    | 0.9 (0.4-2.0) |  |
| MCS                        | VB               | 75/ 1573 (4.8)  | 1                | 1             | 93/ 1488 (6.2)       | 1                | 1 **†         | 168/ 1563 (10.7) | 1                | 1 **‡         |  |
|                            | CS               | 20/ 790 (2.5)   | 0.5 (0.3-0.9)    | 0.5 (0.1-2.2) | 37/ 764 (4.8)        | 0.8 (0.5-1.1)    | 1.3 (0.7-2.2) | 57/ 784 (7.3)    | 0.7 (0.5-0.9)    | 1.1 (0.7-1.7) |  |

**Table S7. Adverse perinatal outcomes by different modes of delivery by regions (Continue).** \*adjusted for maternal age, maternal education, parity, underlying disease, eclampsia, mode of delivery, gestational age, fetal presentation, birth weight, and FCI; facility was adjusted as a random effect; †adjusted for maternal education, eclampsia, underlying disease, mode of delivery, gestational age, fetal presentation, birth weight and FCI; facility was adjusted as a random effect; ‡adjusted for maternal age, maternal education, parity, eclampsia, underlying disease, mode of delivery, gestational age, fetal presentation, birth weight, and FCI; facility was adjusted as a random effect; § adjusted for maternal age, maternal education, eclampsia, underlying disease, mode of delivery, gestational age, fetal presentation, birth weight, and FCI; facility was adjusted as a random effect; || adjusted for maternal education, marital status, eclampsia, underlying disease, mode of delivery, gestational age, fetal presentation, birth weight, sex and FCI; facility was adjusted as a random effect; \*\*adjusted for maternal age, maternal education, marital status, eclampsia, underlying disease, mode of delivery, gestational age, fetal presentation, birth weight, sex, and FCI; facility was adjusted as a random effect; \*†adjusted for maternal age, maternal education, parity, eclampsia, preeclampsia, mode of delivery, gestational age, fetal presentation, birth weight, sex, and FCI; facility was adjusted as a random effect; \*‡adjusted for maternal education, marital status, parity, mode of delivery, gestational age, fetal presentation, birth weight, and FCI; facility was adjusted as a random effect; \*§adjusted for maternal age, maternal education, marital status, parity, eclampsia, underlying disease, mode of delivery, gestational age, fetal presentation, birth weight, and FCI; facility was adjusted as a random effect; \*|| adjusted for maternal education, underlying disease, mode of delivery, gestational age, fetal presentation, birth weight, sex, and FCI; facility was adjusted as a random effect; †† adjusted for maternal age, maternal education, parity, eclampsia, mode of delivery, gestational age, fetal presentation, birth weight, and FCI; facility was adjusted as a random effect; †‡ adjusted for maternal age, maternal education, underlying disease, mode of delivery, gestational age, fetal presentation, birth weight, sex, and FCI; facility was adjusted as a random effect; ‡§ adjusted for maternal education, parity, eclampsia, preeclampsia, mode of delivery, gestational age, fetal presentation, birth weight, and sex; facility was adjusted as a random effect; ‡|| adjusted for maternal education, eclampsia, preeclampsia, mode of delivery, gestational age, birth weight, and sex; facility was adjusted as a random effect; ‡‡ adjusted for maternal education, parity, eclampsia, preeclampsia, mode of delivery, gestational age, fetal presentation, birth weight, and sex; facility was adjusted as a random effect; ‡§ adjusted for maternal age, maternal education, parity, eclampsia, preeclampsia, underlying disease, mode of delivery, gestational age,

fetal presentation, birth weight, and FCI; facility was adjusted as a random effect; ‡|| adjusted for maternal education, eclampsia, preeclampsia, mode of delivery, gestational age, fetal presentation, birth weight, and FCI; facility was adjusted as a random effect; §§ adjusted for maternal education, parity, eclampsia, preeclampsia, underlying disease, mode of delivery, gestational age, fetal presentation, birth weight, sex, and FCI; facility was adjusted as a random effect; §|| adjusted for maternal education, preeclampsia, mode of delivery, gestational age, fetal presentation, birth weight, and FCI; facility was adjusted as a random effect; |||| adjusted for maternal education, parity, mode of delivery, gestational age, fetal presentation, birth weight, and FCI; facility was adjusted as a random effect; \*\*\* adjusted for maternal education, parity, preeclampsia, mode of delivery, gestational age, fetal presentation, birth weight, and FCI; facility was adjusted as a random effect; \*\*† adjusted for maternal age, maternal education, marital status, eclampsia, mode of delivery, gestational age, and birth weight; facility was adjusted as a random effect; \*\*‡ adjusted for maternal education, mode of delivery, gestational age, fetal presentation, birth weight and FCI; facility was adjusted as a random effect.
